# Supplementary material
Source: PubMed Central journal article supplement (PMC3156051)
Supplement: supp_blood-2010-11-316943_TableS1.pdf [file supp_blood-2010-11-316943_TableS1.pdf]

---

**Immobilized plasminogen domain**

---

| mAb                                  |                    | K4                |                  | K5-PD            |            | BSA        |            |
|--------------------------------------|--------------------|-------------------|------------------|------------------|------------|------------|------------|
| Competitor                           | Buffer             | K4                | Buffer           | K5-PD            | Buffer     | K4         | K5-PD      |
| <b>Absorbance (OD<sub>405</sub>)</b> |                    |                   |                  |                  |            |            |            |
| 109                                  | 0.137±.003         | 0.137±.003        | 0.234±.012       | 0.227±.003       | 0.242±.01  | 0.127±.002 | 0.164±.003 |
| 51                                   | <b>0.489 ±.019</b> | <b>0.309±.003</b> | 0.293±.017       | 0.262±.002       | 0.241±.01  | 0.148±.001 | 0.214±.001 |
| 116                                  | 0.228±.032         | 0.182±.006        | <b>0.908±.05</b> | <b>0.947±.03</b> | 0.325±.02  | 0.180±.002 | 0.279±.01  |
| Buffer                               | 0.121±.004         | 0.122±.002        | 0.160±.009       | 0.146±.004       | 0.144±.004 | 0.113±.001 | 0.139±.002 |

---

Binding of RIBS mAbs (290 nM) to immobilized isolated domains of Glu-plasminogen or to BSA, as a control, was determined in the presence of either buffer or soluble plasminogen domains (1 μM). Results are mean ± SEM; n= 3 for each experimental group. Bolded results indicate results that are significantly different (p<0.05) compared to corresponding controls with BSA immobilized onto the microtiter wells.
